# Supplementary material for: Identification of novel candidates for inhibition ofLasR, a quorum-sensing receptor of multidrug resistantPseudomonas aeruginosa, through a specialized multi-levelin silicoapproach
Source: Royal Society of Chemistry journal article supplement (doi:10.1039/d2me00009a), 2022-01-01
Supplement: d2me00009a1.pdf [file d2me00009a1.pdf]

## SUPPLEMENTARY INFORMATION

### Identification of Novel Candidates for Inhibition of *LasR*, a Quorum-Sensing Receptor of Multidrug Resistant *Pseudomonas aeruginosa*, through a specialized Multi-level in silico Approach

Rita P. Magalhães<sup>1,2</sup>, Tatiana F. Vieira<sup>1,2</sup>, André Melo<sup>2</sup> and Sérgio F. Sousa<sup>1,2,\*</sup>

<sup>1</sup>UCIBIO/REQUIMTE, BioSIM – Departamento de Medicina, Faculdade de Medicina da Universidade Do Porto, Alameda Prof. Hernâni Monteiro, 4200-319 Porto, Portugal

<sup>2</sup>Associate Laboratory i4HB - Institute for Health and Bioeconomy, Faculdade de Medicina, Universidade do Porto, 4200-319 Porto, Portugal

<sup>3</sup>LAQV/REQUIMTE, Departamento de Química e Bioquímica, Faculdade de Ciências da Universidade do Porto, Rua do Campo Alegre, 4169-007 Porto, Portugal

**Table S1:** Full characterization of all available LasR PDB structures and bound ligands.

| PDB CODE | Resolution Å | Year of Deposition | Ligand            | Type of Ligand         | IUPAC NAME                                                                         |
|----------|--------------|--------------------|-------------------|------------------------|------------------------------------------------------------------------------------|
| 2uv0     | 1.8          | 2007               | C12-HSL           | Autoinducer            | 3-oxo-N-[(3S)-2-oxooxolan-3-yl]dodecanamide                                        |
| 3ix3     | 1.4          | 2009               | C12-HSL           | Autoinducer            | 3-oxo-N-[(3S)-2-oxooxolan-3-yl]dodecanamide                                        |
| 3ix4     | 1.8          | 2009               | TP-1              | TP-derived Agonist     | [2,4-dibromo-6-[[[(2-nitrobenzoyl)amino]methyl]phenyl] 2-chlorobenzoate            |
| 3ix8     | 1.8          | 2009               | TP-3              | TP-derived Agonist     | [2,4-dibromo-6-[[[(2-chlorobenzoyl)amino]methyl]phenyl] 2-methylbenzoate           |
| 3jpu     | 2.3          | 2013               | TP-4              | TP-derived Agonist     | [4-bromo-2-[[[(2-chlorobenzoyl)amino]methyl]-6-methylphenyl] 2,4-dichlorobenzoate  |
| 4ng2     | 2.41         | 2018               | C12-HSL           | Autoinducer            | 3-oxo-N-[(3S)-2-oxooxolan-3-yl]dodecanamide                                        |
| 6d6a     | 1.9          | 2018               | TP-1 Homologue 10 | TP-derived Agonist     | [2,4-dibromo-6-[[[(2-nitrobenzoyl)amino]methyl]phenyl] benzoate                    |
| 6d6b     | 1.7          | 2018               | TP-1 Homologue 11 | TP-derived Agonist     | [2,4-dibromo-6-[[[(2-nitrobenzoyl)amino]methyl]phenyl] 2-nitrobenzoate             |
| 6d6c     | 1.88         | 2018               | TP-1 Homologue 12 | TP-derived Agonist     | [2,4-dibromo-6-[[[(2-nitrobenzoyl)amino]methyl]phenyl] 2-methoxybenzoate           |
| 6d6d     | 1.7          | 2018               | TP-1 Homologue 13 | TP-derived Agonist     | [2,4-dibromo-6-[[[(2-nitrobenzoyl)amino]methyl]phenyl] 2-cyanobenzoate             |
| 6d6l     | 1.63         | 2018               | TP-1 Homologue 14 | TP-derived Agonist     | [2,4-dibromo-6-[[[(2-nitrobenzoyl)amino]methyl]phenyl] 4-chlorobenzoate            |
| 6d6m     | 1.9          | 2018               | TP-1 Homologue 15 | TP-derived Agonist     | [2,4-dibromo-6-[[[(2-nitrobenzoyl)amino]methyl]phenyl] 4-bromobenzoate             |
| 6d6n     | 1.81         | 2018               | TP-1 Homologue 16 | TP-derived Agonist     | [2,4-dibromo-6-[[[(2-nitrobenzoyl)amino]methyl]phenyl] 4-methoxybenzoate           |
| 6d6o     | 1.65         | 2018               | TP-1 Homologue 17 | TP-derived Agonist     | [2,4-dibromo-6-[[[(2-nitrobenzoyl)amino]methyl]phenyl] octanoate                   |
| 6d6p     | 1.65         | 2018               | TP-1 Homologue 19 | TP-derived Agonist     | N-[[[3,5-dibromo-2-(methoxymethoxy)phenyl]methyl]-2-nitrobenzamide                 |
| 6mvm*    | 1.89         | 2018               | C14-HSL           | Noncognate Autoinducer | 3-oxo-N-[(3S)-2-oxotetrahydrofuran-3-yl]tetradecanamide                            |
| 6mvn*    | 2.2          | 2018               | C10-HSL           | Noncognate Autoinducer | 3-oxo-N-[(3S)-2-oxotetrahydrofuran-3-yl]decanamide                                 |
| 6mwh     | 2.2          | 2018               | BB0020            | Agonist                | 2-(3-bromophenoxy)-N-[(1S,2S,3R,5S)-2-hydroxy-3-bicyclo[3.1.0]hexanyl]acetamide    |
| 6mwl     | 1.5          | 2018               | mBTL              | Agonist                | 4-(3-bromophenoxy)-N-[(3S)-2-oxothiolan-3-yl]butanamide                            |
| 6mww     | 2.76         | 2018               | BB0126            | Agonist                | 4-(3-methylsulfonylphenoxy)-N-[(1R,3R,5R)-2-oxo-3-bicyclo[3.1.0]hexanyl]butanamide |
| 6mwz*    | 1.66         | 2018               | BB0126            | Agonist                | 4-(3-methylsulfonylphenoxy)-N-[(1S,3S,5S)-2-oxo-3-bicyclo[3.1.0]hexanyl]butanamide |

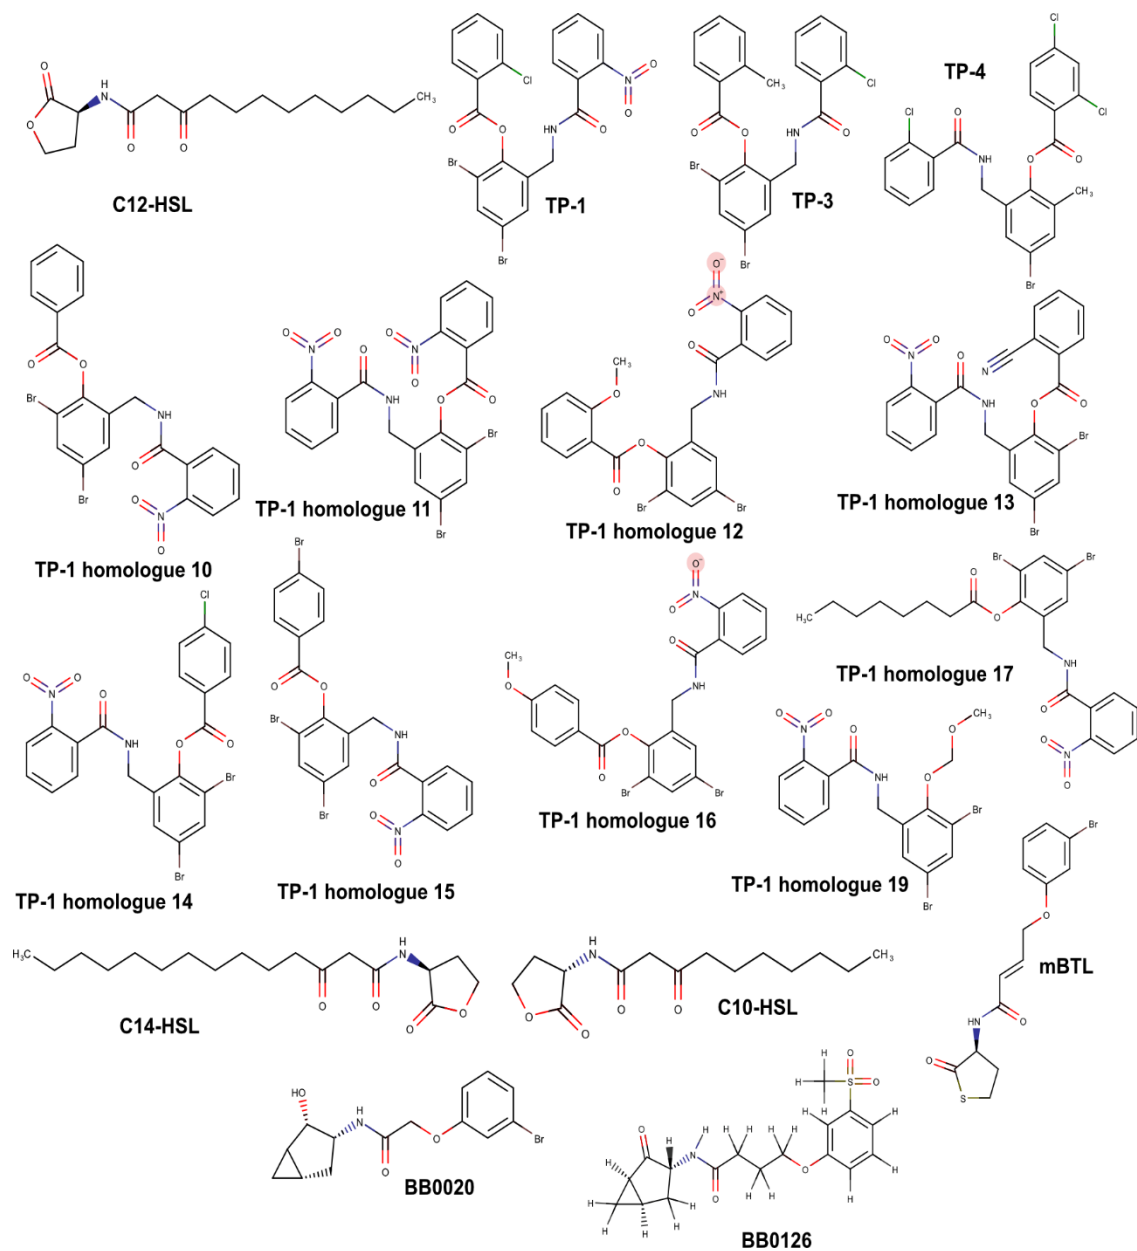

**Figure S1:** Chemical structures of all ligands bound to LasR structures described in Table S1.

**Table S2:** Normalised scores for the Re-Docking experiments with all available LasR structures. Scores were normalized to vary from 1 (lowest) to 10 (highest), allowing for comparison between different scoring functions. Structures coupled with the natural autoinducer are shaded in grey. Mutated structures are evidenced by a star.

| Normalised Score | AutoDock | Vina | ChemPLP | GoldScore | ChemScore | ASP  | LeDock |
|------------------|----------|------|---------|-----------|-----------|------|--------|
| 2uv0             | 1.0      | 1.9  | 2.5     | 2.5       | 2.2       | 2.3  | 3.0    |
| 3ix3             | 1.7      | 1.8  | 1.2     | 2.9       | 2.3       | 1.9  | 2.8    |
| 4ng2             | 1.8      | 1.0  | 2.2     | 1.0       | 1.0       | 1.9  | 5.2    |
| 3ix4             | 9.8      | 10.0 | 10.0    | 8.9       | 9.4       | 10.0 | 6.6    |
| 3ix8             | 7.5      | 9.7  | 8.8     | 8.7       | 10.0      | 6.6  | 6.9    |
| 3jpu             | 6.1      | 9.2  | 8.5     | 7.7       | 9.4       | 6.3  | 1.0    |
| 6d6a             | 8.8      | 9.5  | 9.2     | 7.3       | 7.5       | 8.9  | 8.8    |
| 6d6b             | 10.0     | 10.0 | 9.0     | 10.0      | 7.3       | 9.8  | 10.0   |
| 6d6c             | 9.5      | 9.8  | 9.7     | 9.1       | 9.4       | 9.7  | 8.1    |
| 6d6d             | 9.9      | 9.5  | 9.9     | 8.1       | 8.4       | 10.0 | 9.8    |
| 6d6l             | 8.5      | 9.8  | 8.0     | 7.4       | 7.7       | 8.5  | 8.3    |
| 6d6m             | 8.7      | 10.0 | 7.6     | 5.7       | 7.0       | 8.4  | 8.5    |
| 6d6n             | 8.5      | 9.5  | 8.9     | 8.4       | 7.5       | 9.6  | 7.3    |
| 6d6o             | 6.0      | 6.4  | 8.9     | 8.5       | 6.3       | 8.6  | 8.0    |
| 6d6p             | 6.0      | 6.7  | 4.3     | 6.2       | 4.3       | 6.5  | 5.0    |
| 6mvm*            | 2.2      | 1.5  | 2.9     | 3.6       | 2.3       | 2.4  | 3.0    |
| 6mvm             | 1.8      | 1.3  | 1.4     | 2.8       | 2.0       | 1.0  | 1.5    |
| 6mwh             | 2.9      | 3.8  | 1.8     | 2.4       | 3.7       | 2.6  | 3.1    |
| 6mwl             | 2.3      | 2.4  | 2.0     | 2.5       | 3.5       | 1.7  | 4.4    |
| 6mww             | 4.2      | 4.9  | 3.3     | 5.4       | 3.4       | 3.2  | 3.8    |
| 6mwz*            | 5.7      | 3.3  | 1.0     | 5.1       | 7.2       | 6.4  | 5.1    |
| Average          | 5.8      | 6.3  | 5.8     | 5.9       | 5.8       | 6.0  | 5.7    |

**Table S3:** Cross-Docking Results for the Molecular Docking with AutoDock Vina for all LasR Structures

| LIG  | VINA        |             |             |              |              |              |              |              |              |              |              |              |              |              |              |             |             |              |             |              |              |
|------|-------------|-------------|-------------|--------------|--------------|--------------|--------------|--------------|--------------|--------------|--------------|--------------|--------------|--------------|--------------|-------------|-------------|--------------|-------------|--------------|--------------|
|      | Receptors   |             |             |              |              |              |              |              |              |              |              |              |              |              |              |             |             |              |             |              |              |
|      | 2uv0        | 3ix3        | 4ng2        | 3ix4         | 3ix8         | 3jpu         | 6d6a         | 6d6b         | 6d6c         | 6d6d         | 6d6l         | 6d6m         | 6d6n         | 6d6o         | 6d6p         | 6mvm        | 6mvm        | 6mwh         | 6mwl        | 6mww         | 6mwz         |
| 2uv0 | <b>-8.8</b> | -8.7        | -8.3        | -8.3         | -7.9         | -7.9         | -8.3         | -8.2         | -8.3         | -8.3         | -8.7         | -8.0         | -8.1         | -8.1         | -8.3         | -8.3        | -8.7        | -8.3         | -7.7        | -8.3         | -8.8         |
| 3ix3 | -8.8        | <b>-8.5</b> | -8.6        | -8.3         | -7.8         | -8.1         | -8.2         | -8.2         | -8.2         | -8.3         | -8.4         | -7.8         | -7.8         | -7.7         | -8.3         | -8.4        | -8.7        | -8.2         | -8.1        | -8.3         | -8.8         |
| 4ng2 | -8.8        | -8.4        | <b>-8.4</b> | -8.3         | -8.1         | -8.2         | -8.2         | -8.3         | -8.1         | -8.3         | -8.1         | -7.8         | -7.9         | -8.1         | -8.3         | -8.3        | -8.6        | -8.4         | -8.1        | -8.1         | -8.8         |
| 3ix4 | -8.6        | -9.0        | -9.5        | <b>-14.0</b> | -12.9        | -13.0        | -14.0        | -14.0        | -14.0        | -14.0        | -13.6        | -13.3        | -13.3        | -13.7        | -13.5        | -10.3       | -8.2        | -11.9        | -11.9       | -10.4        | -9.4         |
| 3ix8 | -10.9       | -11.0       | -9.5        | -14.0        | <b>-13.8</b> | -13.6        | -13.9        | -14.1        | -14.0        | -14.2        | -13.6        | -13.1        | -13.4        | -13.5        | -13.5        | -10.3       | -10.4       | -13.3        | -12.6       | -9.4         | -9.9         |
| 3jpu | -8.7        | -9.7        | -9.0        | -14.0        | -13.5        | <b>-13.7</b> | -13.8        | -13.9        | -14.0        | -14.2        | -14.3        | -13.8        | -14.2        | -14.3        | -14.2        | -10.3       | -8.5        | -12.2        | -12.8       | -10.3        | -9.4         |
| 6d6a | -9.2        | -9.1        | -9.2        | -13.8        | -12.5        | -12.7        | <b>-13.7</b> | -13.7        | -13.7        | -13.8        | -13.6        | -13.2        | -13.5        | -13.7        | -13.4        | -9.7        | -8.5        | -11.5        | -11.5       | -9.5         | -10.1        |
| 6d6b | -8.9        | -9.5        | -9.3        | -13.7        | -12.8        | -12.6        | -13.7        | <b>-14.0</b> | -13.7        | -13.8        | -13.9        | -13.6        | -13.3        | -13.5        | -13.5        | -10.0       | -7.8        | -11.7        | -12.1       | -9.6         | -9.4         |
| 6d6c | -9.2        | -9.2        | -9.0        | -13.8        | -12.7        | -12.9        | -13.6        | -13.8        | <b>-13.9</b> | -14.1        | -13.7        | -13.2        | -13.4        | -13.7        | -13.6        | -9.5        | -8.2        | -11.6        | -11.5       | -9.5         | -8.7         |
| 6d6d | -8.7        | -9.0        | -9.3        | -13.9        | -12.8        | -12.9        | -13.7        | -14.2        | -13.7        | <b>-14.1</b> | -13.7        | -13.4        | -13.5        | -13.7        | -13.6        | -10.2       | -8.0        | -11.9        | -12.1       | -9.9         | -8.8         |
| 6d6l | -8.7        | -7.9        | -9.5        | -13.7        | -12.0        | -12.7        | -13.2        | -13.5        | -13.4        | -13.7        | <b>-13.9</b> | -13.5        | -13.7        | -14.1        | -13.7        | -10.1       | -6.9        | -10.9        | -11.9       | -9.9         | -9.2         |
| 6d6m | -8.6        | -9.1        | -9.5        | -13.3        | -11.1        | -12.4        | -13.0        | -13.0        | -13.0        | -13.2        | -14.2        | <b>-14.0</b> | -14.1        | -14.3        | -14.1        | -10.5       | -7.3        | -10.8        | -11.8       | -8.4         | -8.7         |
| 6d6n | -7.9        | -8.9        | -8.7        | -13.4        | -12.3        | -12.5        | -13.3        | -13.3        | -13.3        | -13.7        | -13.8        | -13.4        | <b>-13.7</b> | -13.9        | -13.8        | -10.1       | -6.2        | -10.0        | -11.6       | -9.5         | -8.6         |
| 6d6o | -7.3        | -8.4        | -8.6        | -11.7        | -10.2        | -10.9        | -11.7        | -11.6        | -11.7        | -11.9        | -11.6        | -11.3        | -11.5        | <b>-11.7</b> | -11.7        | -9.5        | -7.2        | -9.8         | -10.1       | -8.8         | -8.3         |
| 6d6p | -9.3        | -9.2        | -9.4        | -11.4        | -10.0        | -10.5        | -11.2        | -11.3        | -11.4        | -11.7        | -11.8        | -11.5        | -11.8        | -12.0        | <b>-11.9</b> | -9.0        | -9.3        | -9.3         | -9.8        | -10.1        | -9.3         |
| 6mvm | -9.0        | -8.7        | -8.5        | -8.4         | -8.0         | -8.0         | -8.6         | -8.2         | -8.3         | -8.5         | -8.3         | -7.7         | -8.0         | -7.9         | -7.7         | <b>-8.5</b> | -9.1        | -8.4         | -8.2        | -8.2         | -8.9         |
| 6mvm | -8.5        | -8.3        | -8.4        | -7.8         | -7.7         | -7.7         | -8.3         | -8.2         | -8.1         | -8.1         | -8.3         | -7.9         | -8.0         | -7.9         | -8.1         | -8.4        | <b>-8.4</b> | -8.2         | -7.7        | -8.2         | -8.8         |
| 6mwh | -10.8       | -10.6       | -10.2       | -10.6        | -10.3        | -10.2        | -10.9        | -10.8        | -10.7        | -10.9        | -9.9         | -10.0        | -9.8         | -10.1        | -9.7         | -10.2       | -10.5       | <b>-10.5</b> | -10.3       | -10.3        | -10.6        |
| 6mwl | -10.1       | -9.7        | -9.6        | -9.5         | -9.2         | -9.3         | -9.5         | -9.3         | -9.5         | -9.4         | -9.4         | -9.2         | -9.2         | -9.3         | -9.6         | -9.7        | -9.8        | -9.8         | <b>-9.1</b> | -9.9         | -9.9         |
| 6mww | -10.7       | -10.7       | -10.4       | -9.5         | -10.2        | -10.2        | -9.6         | -10.0        | -9.9         | -9.7         | -9.4         | -8.9         | -9.2         | -9.4         | -9.1         | -10.8       | -11.0       | -10.6        | -9.8        | <b>-10.7</b> | -11.0        |
| 6mwz | -10.3       | -10.7       | -10.9       | -10.0        | -10.0        | -10.3        | -10.0        | -10.4        | -10.2        | -10.3        | -9.8         | -9.8         | -9.7         | -9.9         | -10.0        | -10.7       | -11.0       | -10.6        | -10.3       | -10.6        | <b>-11.4</b> |

**Table S4:** Cross-Docking Results for the Molecular Docking with AutoDock 4 for all LasR Structures

| LIG  | AutoDock     |              |              |              |              |              |              |              |              |              |              |              |              |              |              |              |              |              |              |              |              |
|------|--------------|--------------|--------------|--------------|--------------|--------------|--------------|--------------|--------------|--------------|--------------|--------------|--------------|--------------|--------------|--------------|--------------|--------------|--------------|--------------|--------------|
|      | Receptors    |              |              |              |              |              |              |              |              |              |              |              |              |              |              |              |              |              |              |              |              |
|      | 2uv0         | 3ix3         | 4ng2         | 3ix4         | 3ix8         | 3jpu         | 6d6a         | 6d6b         | 6d6c         | 6d6d         | 6d6l         | 6d6m         | 6d6n         | 6d6o         | 6d6p         | 6mvm         | 6mvm         | 6mwh         | 6mwl         | 6mww         | 6mwz         |
| 2uv0 | <b>-11.0</b> | -11.7        | -11.8        | -11.1        | -11.0        | -11.1        | -11.1        | -11.0        | -10.9        | -11.5        | -10.9        | -10.3        | -10.7        | -10.7        | -10.5        | -11.5        | -11.8        | -11.5        | -11.4        | -11.6        | -12.0        |
| 3ix3 | -12.4        | <b>-11.6</b> | -12.0        | -11.3        | -11.4        | -10.9        | -11.2        | -10.9        | -10.7        | -11.1        | -10.4        | -11.0        | -10.7        | -10.7        | -10.6        | -11.5        | -11.7        | -11.7        | -11.2        | -11.3        | -12.5        |
| 4ng2 | -12.4        | -11.5        | <b>-11.7</b> | -10.9        | -11.0        | -10.6        | -10.9        | -10.9        | -10.5        | -11.0        | -10.7        | -11.0        | -10.9        | -10.7        | -10.5        | -11.3        | -11.7        | -11.6        | -11.2        | -11.3        | -12.4        |
| 3ix4 | -16.2        | -16.6        | -16.2        | <b>-19.3</b> | -19.4        | -19.2        | -18.6        | -19.2        | -18.9        | -18.5        | -18.1        | -17.7        | -18.4        | -18.0        | -18.0        | -15.5        | -15.2        | -19.4        | -18.1        | -17.7        | -18.8        |
| 3ix8 | -14.3        | -14.7        | -13.8        | -16.7        | <b>-17.1</b> | -17.0        | -15.4        | -16.1        | -16.1        | -16.9        | -16.2        | -15.8        | -16.0        | -16.2        | -15.5        | -15.5        | -14.8        | -16.6        | -15.8        | -15.6        | -16.7        |
| 3jpu | -14.6        | -12.4        | -15.3        | -16.3        | -17.2        | <b>-15.8</b> | -16.8        | -16.5        | -16.3        | -16.3        | -15.6        | -15.8        | -16.1        | -16.3        | -15.5        | -15.1        | -13.2        | -15.9        | -15.3        | -14.6        | -16.3        |
| 6d6a | -16.7        | -16.0        | -16.3        | -18.5        | -18.2        | -17.9        | <b>-18.3</b> | -18.1        | -17.7        | -18.3        | -17.5        | -17.3        | -17.6        | -17.5        | -17.4        | -15.7        | -17.1        | -16.8        | -17.5        | -16.2        | -17.4        |
| 6d6b | -17.5        | -15.1        | -18.2        | -19.5        | -19.6        | -19.6        | -19.6        | <b>-19.5</b> | -19.3        | -20.1        | -15.3        | -17.9        | -18.5        | -18.7        | -18.7        | -16.9        | -17.2        | -19.1        | -17.4        | -17.5        | -19.2        |
| 6d6c | -15.7        | -16.8        | -17.5        | -18.8        | -19.2        | -19.0        | -19.0        | -18.4        | <b>-19.1</b> | -19.2        | -18.3        | -17.7        | -17.4        | -18.2        | -17.8        | -17.7        | -16.8        | -18.2        | -16.9        | -18.5        | -17.3        |
| 6d6d | -14.6        | -15.6        | -17.0        | -18.9        | -18.6        | -18.8        | -19.0        | -19.1        | -19.0        | <b>-19.4</b> | -17.7        | -18.1        | -18.0        | -18.4        | -18.1        | -18.0        | -14.8        | -17.5        | -18.4        | -16.9        | -18.2        |
| 6d6l | -17.0        | -17.1        | -17.2        | -19.3        | -17.9        | -18.8        | -19.0        | -18.8        | -18.2        | -18.9        | <b>-18.1</b> | -17.7        | -16.8        | -18.3        | -18.0        | -16.8        | -17.1        | -18.1        | -18.6        | -17.5        | -18.3        |
| 6d6m | -14.1        | -16.5        | -16.4        | -19.3        | -19.5        | -18.2        | -19.6        | -19.1        | -19.1        | -19.5        | -17.3        | <b>-18.2</b> | -18.0        | -18.8        | -17.6        | -16.8        | -15.5        | -17.6        | -18.5        | -17.3        | -17.2        |
| 6d6n | -17.0        | -16.7        | -17.2        | -18.8        | -18.2        | -18.9        | -19.5        | -18.2        | -18.5        | -18.4        | -17.6        | -17.9        | <b>-18.1</b> | -18.4        | -17.5        | -17.0        | -17.1        | -17.8        | -17.6        | -17.9        | -18.4        |
| 6d6o | -15.4        | -16.4        | -15.7        | -17.8        | -18.0        | -17.4        | -18.5        | -18.2        | -17.4        | -17.7        | -17.4        | -15.8        | -18.1        | <b>-15.7</b> | -17.3        | -16.1        | -15.0        | -17.8        | -16.8        | -16.0        | -17.7        |
| 6d6p | -15.8        | -15.2        | -16.3        | -15.9        | -16.3        | -16.1        | -16.5        | -16.0        | -15.9        | -16.2        | -16.0        | -15.7        | -16.0        | -16.3        | <b>-15.7</b> | -16.1        | -15.3        | -15.8        | -16.1        | -16.3        | -16.7        |
| 6mvm | -13.0        | -12.3        | -11.9        | -11.4        | -11.7        | -11.8        | -12.0        | -12.1        | -11.2        | -11.4        | -11.4        | -10.7        | -11.6        | -11.4        | -10.9        | <b>-12.1</b> | -12.8        | -12.7        | -12.5        | -12.2        | -12.7        |
| 6mvm | -12.7        | -11.0        | -12.1        | -11.1        | -10.7        | -10.5        | -11.1        | -10.7        | -10.4        | -10.6        | -10.3        | -10.6        | -10.3        | -10.4        | -10.5        | -11.2        | <b>-11.8</b> | -11.8        | -11.4        | -10.9        | -12.4        |
| 6mwh | -12.6        | -11.8        | -12.4        | -12.5        | -12.3        | -12.0        | -12.7        | -12.6        | -12.2        | -12.7        | -12.5        | -12.2        | -11.8        | -12.2        | -12.0        | -11.9        | -12.2        | <b>-12.7</b> | -12.3        | -12.3        | -13.1        |
| 6mwl | -13.4        | -12.7        | -12.7        | -12.2        | -12.2        | -12.1        | -12.4        | -12.1        | -12.1        | -12.1        | -11.7        | -11.5        | -12.0        | -11.8        | -11.6        | -12.6        | -13.0        | -13.0        | <b>-12.2</b> | -13.0        | -13.2        |
| 6mww | -14.0        | -13.3        | -13.8        | -13.5        | -13.3        | -13.5        | -13.1        | -13.5        | -13.4        | -13.6        | -12.6        | -13.5        | -12.6        | -12.6        | -12.5        | -13.7        | -13.7        | -14.0        | -13.3        | <b>-14.0</b> | -15.1        |
| 6mwz | -13.4        | -13.5        | -13.6        | -13.5        | -13.6        | -13.1        | -12.8        | -13.7        | -13.5        | -13.3        | -12.5        | -12.1        | -12.7        | -12.6        | -13.0        | -13.7        | -13.5        | -14.5        | -13.6        | -14.1        | <b>-15.5</b> |

**Table S5:** Cross-Docking Results for the Molecular Docking with LeDock for all LasR Structures

| LIG  | LeDock    |             |             |              |              |              |              |              |              |              |              |              |       |              |             |             |             |             |             |             |             |
|------|-----------|-------------|-------------|--------------|--------------|--------------|--------------|--------------|--------------|--------------|--------------|--------------|-------|--------------|-------------|-------------|-------------|-------------|-------------|-------------|-------------|
|      | Receptors |             |             |              |              |              |              |              |              |              |              |              |       |              |             |             |             |             |             |             |             |
|      | 2uv0      | 3ix3        | 4ng2        | 3ix4         | 3ix8         | 3jpu         | 6d6a         | 6d6b         | 6d6c         | 6d6d         | 6d6l         | 6d6m         | 6d6n  | 6d6o         | 6d6p        | 6mvm        | 6mvm        | 6mwh        | 6mwl        | 6mww        | 6mwz        |
| 2uv0 | -8.2      | -7.9        | -7.5        | -7.1         | -6.4         | -6.9         | -6.9         | -6.9         | -6.8         | -6.7         | -6.8         | -6.4         | -6.8  | -6.8         | -6.6        | -7.5        | -7.3        | -7.3        | -7.0        | -7.1        | -7.7        |
| 3ix3 | -8.3      | <b>-8.0</b> | -7.8        | -7.1         | -7.0         | -7.3         | -7.1         | -6.7         | -6.6         | -6.9         | -6.9         | -6.7         | -6.9  | -6.5         | -6.8        | -7.5        | -7.4        | -7.3        | -7.1        | -7.5        | -7.7        |
| 4ng2 | -8.4      | -7.9        | <b>-7.5</b> | -7.7         | -6.6         | -7.0         | -6.9         | -7.2         | -6.7         | -7.4         | -6.7         | -6.3         | -6.4  | -6.8         | -6.9        | -7.5        | -7.6        | -7.2        | -7.2        | -7.4        | -7.5        |
| 3ix4 | -9.6      | -9.5        | -9.4        | <b>-12.2</b> | -11.1        | -10.7        | -12.1        | -12.1        | -11.7        | -11.9        | -11.3        | -11.2        | -11.3 | -11.4        | -11.3       | -9.3        | -8.4        | -10.6       | -10.8       | -8.6        | -7.6        |
| 3ix8 | -8.6      | -9.7        | -8.4        | -10.3        | <b>-10.6</b> | -10.2        | -10.5        | -10.2        | -9.8         | -10.2        | -10.1        | -9.7         | -10.0 | -10.2        | -10.0       | -8.8        | -7.8        | -9.4        | -9.6        | -7.9        | -8.1        |
| 3jpu | -8.6      | -8.7        | -8.3        | -10.4        | -10.4        | <b>-10.0</b> | -10.0        | -10.2        | -10.1        | -10.1        | -10.8        | -10.6        | -10.5 | -10.6        | -10.5       | -8.6        | -7.2        | -9.5        | -9.6        | -7.6        | -7.8        |
| 6d6a | -9.3      | -9.0        | -8.8        | -11.5        | -10.2        | -10.2        | <b>-11.5</b> | -11.2        | -11.0        | -11.4        | -10.7        | -10.6        | -10.7 | -11.0        | -10.6       | -9.0        | -8.8        | -10.1       | -10.2       | -8.2        | -8.8        |
| 6d6b | -10.0     | -9.8        | -9.0        | -12.3        | -11.4        | -11.1        | -11.9        | <b>-12.2</b> | -11.9        | -12.2        | -11.4        | -11.4        | -11.4 | -11.5        | -11.3       | -9.4        | -9.0        | -10.5       | -11.1       | -8.6        | -8.8        |
| 6d6c | -9.5      | -9.5        | -9.0        | -11.7        | -10.9        | -10.5        | -11.4        | -11.3        | <b>-11.1</b> | -11.3        | -10.7        | -10.5        | -10.6 | -10.9        | -10.4       | -8.7        | -9.0        | -10.7       | -10.4       | -8.4        | -7.3        |
| 6d6d | -9.3      | -9.5        | -9.5        | -12.3        | -11.1        | -10.9        | -11.9        | -12.0        | -11.7        | <b>-12.1</b> | -11.4        | -11.3        | -11.3 | -11.6        | -11.2       | -9.4        | -8.5        | -10.8       | -11.1       | -9.2        | -7.9        |
| 6d6l | -8.7      | -8.6        | -8.5        | -11.2        | -9.9         | -9.7         | -11.2        | -11.1        | -10.5        | -11.1        | <b>-11.2</b> | -11.3        | -11.2 | -11.3        | -11.0       | -8.8        | -8.4        | -9.7        | -10.5       | -8.6        | -8.6        |
| 6d6m | -9.1      | -8.5        | -8.8        | -11.1        | -9.8         | -10.0        | -11.2        | -10.9        | -10.5        | -11.1        | -11.3        | <b>-11.3</b> | -11.2 | -11.4        | -11.1       | -8.4        | -8.3        | -9.8        | -10.5       | -8.2        | -7.0        |
| 6d6n | -8.7      | -8.8        | -8.5        | -11.1        | -9.9         | -10.1        | -11.2        | -10.8        | -11.4        | -10.7        | -10.5        | <b>-10.6</b> | -10.8 | -10.5        | -8.2        | -8.0        | -9.7        | -9.9        | -8.1        | -8.6        |             |
| 6d6o | -8.7      | -8.7        | -7.8        | -10.5        | -9.3         | -9.2         | -10.2        | -10.1        | -9.5         | -10.4        | -10.6        | -10.4        | -10.3 | <b>-11.1</b> | -10.6       | -8.0        | -8.0        | -9.3        | -10.0       | -7.8        | -7.6        |
| 6d6p | -8.4      | -8.2        | -8.9        | -10.1        | -9.4         | -9.0         | -9.9         | -9.9         | -9.7         | -10.0        | -9.4         | -9.3         | -9.4  | -9.5         | <b>-9.3</b> | -7.9        | -8.0        | -9.4        | -9.3        | -8.8        | -8.2        |
| 6mvm | -8.1      | -8.5        | -8.1        | -7.1         | -7.1         | -6.8         | -7.1         | -6.7         | -7.3         | -6.9         | -7.4         | -7.0         | -6.9  | -7.1         | -7.3        | <b>-8.1</b> | -7.0        | -7.5        | -6.9        | -7.5        | -7.9        |
| 6mvm | -7.8      | -7.6        | -7.2        | -7.2         | -6.9         | -6.4         | -7.0         | -6.6         | -6.3         | -6.9         | -6.9         | -6.6         | -6.6  | -6.6         | -6.9        | -7.3        | <b>-7.3</b> | -7.2        | -7.2        | -7.0        | -7.3        |
| 6mwh | -8.6      | -8.3        | -8.0        | -7.8         | -7.7         | -7.6         | -7.9         | -7.8         | -7.6         | -7.9         | -7.7         | -7.2         | -7.4  | -7.5         | -7.6        | -8.0        | -8.3        | <b>-8.2</b> | -7.9        | -8.3        | -8.2        |
| 6mwl | -9.6      | -9.1        | -9.2        | -8.3         | -8.2         | -8.1         | -8.2         | -8.3         | -8.0         | -8.1         | -8.0         | -7.6         | -7.8  | -7.8         | -7.9        | -8.9        | -9.4        | -8.8        | <b>-9.0</b> | -9.1        | -8.7        |
| 6mww | -8.5      | -8.8        | -8.8        | -7.9         | -8.6         | -7.7         | -7.8         | -8.2         | -7.6         | -7.5         | -7.8         | -7.4         | -7.3  | -7.9         | -7.4        | -8.8        | -8.5        | -8.7        | -8.6        | <b>-8.6</b> | -8.6        |
| 6mwz | -9.1      | -9.3        | -9.4        | -8.2         | -8.4         | -8.3         | -7.8         | -8.6         | -8.0         | -8.2         | -8.2         | -7.6         | -7.5  | -7.8         | -8.2        | -9.0        | -8.7        | -9.3        | -8.8        | -9.1        | <b>-9.4</b> |

**Table S6:** Cross-Docking Results for the Molecular Docking with Gold ChemPLP scoring function for all LasR Structures.

| LIG  | Gold - ChemPLP |             |             |              |              |              |              |              |              |              |              |              |              |              |             |             |             |             |             |             |             |
|------|----------------|-------------|-------------|--------------|--------------|--------------|--------------|--------------|--------------|--------------|--------------|--------------|--------------|--------------|-------------|-------------|-------------|-------------|-------------|-------------|-------------|
|      | Receptors      |             |             |              |              |              |              |              |              |              |              |              |              |              |             |             |             |             |             |             |             |
|      | 2uv0           | 3ix3        | 4ng2        | 3ix4         | 3ix8         | 3jpu         | 6d6a         | 6d6b         | 6d6c         | 6d6d         | 6d6l         | 6d6m         | 6d6n         | 6d6o         | 6d6p        | 6mvm        | 6mvm        | 6mwh        | 6mwl        | 6mww        | 6mwz        |
| 2uv0 | 86.7           | 87.3        | 87.0        | 76.2         | 73.8         | 74.2         | 80.8         | 74.9         | 76.0         | 78.5         | 76.7         | 74.8         | 76.4         | 74.5         | 74.4        | 88.6        | 89.0        | 74.8        | 84.9        | 80.3        | 71.0        |
| 3ix3 | 91.7           | <b>89.3</b> | 90.4        | 76.4         | 77.2         | 75.1         | 79.5         | 75.0         | 75.4         | 77.5         | 75.4         | 73.8         | 77.2         | 72.8         | 73.9        | 89.5        | 93.4        | 74.4        | 86.7        | 79.5        | 72.2        |
| 4ng2 | 89.8           | 88.1        | <b>85.7</b> | 74.2         | 75.2         | 74.3         | 81.8         | 77.8         | 74.2         | 80.9         | 81.7         | 73.2         | 77.9         | 72.7         | 74.4        | 84.0        | 84.1        | 77.2        | 81.7        | 85.6        | 72.0        |
| 3ix4 | 93.5           | 95.6        | 86.4        | <b>124.7</b> | 118.1        | 121.9        | 124.3        | 122.6        | 124.2        | 123.3        | 114.7        | 115.6        | 119.8        | 119.4        | 116.5       | 88.5        | 87.8        | 110.9       | 106.8       | 95.3        | 82.0        |
| 3ix8 | 104.2          | 104.7       | 94.3        | 121.7        | <b>120.8</b> | 120.2        | 122.5        | 122.0        | 120.5        | 124.5        | 115.6        | 109.4        | 111.1        | 118.0        | 108.1       | 98.2        | 98.9        | 116.7       | 107.9       | 80.2        | 76.2        |
| 3jpu | 92.9           | 96.1        | 86.6        | 123.4        | 119.0        | <b>123.1</b> | 122.2        | 122.4        | 121.8        | 124.9        | 117.1        | 112.3        | 118.2        | 114.7        | 114.3       | 96.2        | 83.0        | 110.3       | 107.7       | 71.1        | 65.7        |
| 6d6a | 94.2           | 93.8        | 83.6        | 119.6        | 109.1        | 115.2        | <b>120.4</b> | 119.8        | 117.9        | 119.8        | 116.6        | 110.1        | 114.8        | 116.6        | 111.4       | 83.4        | 91.3        | 106.1       | 104.9       | 90.5        | 84.5        |
| 6d6b | 95.3           | 95.6        | 87.7        | 123.5        | 118.5        | 120.6        | 125.0        | <b>121.8</b> | 120.8        | 123.3        | 124.3        | 120.5        | 121.6        | 123.3        | 119.2       | 89.8        | 92.4        | 116.4       | 108.4       | 88.0        | 83.5        |
| 6d6c | 98.9           | 101.2       | 84.5        | 126.4        | 114.1        | 117.4        | 124.8        | 126.3        | <b>124.4</b> | 130.1        | 120.8        | 116.6        | 116.8        | 121.6        | 118.3       | 89.2        | 96.5        | 111.3       | 107.4       | 87.0        | 89.1        |
| 6d6d | 96.8           | 95.6        | 84.3        | 127.1        | 120.1        | 122.7        | 127.9        | 127.3        | 125.8        | <b>126.9</b> | 123.6        | 121.2        | 126.3        | 122.9        | 119.0       | 89.0        | 91.9        | 111.2       | 110.2       | 83.0        | 78.0        |
| 6d6l | 82.7           | 77.7        | 83.7        | 122.4        | 114.3        | 115.4        | 118.6        | 123.1        | 118.3        | 121.9        | <b>114.7</b> | 117.5        | 118.4        | 117.5        | 119.1       | 85.3        | 74.6        | 104.0       | 105.0       | 87.9        | 76.6        |
| 6d6m | 78.3           | 84.9        | 74.9        | 119.9        | 108.9        | 113.6        | 121.1        | 124.9        | 120.8        | 122.6        | 122.1        | <b>114.1</b> | 120.1        | 124.0        | 117.3       | 71.3        | 74.0        | 103.8       | 101.4       | 83.5        | 87.4        |
| 6d6n | 77.0           | 84.7        | 79.3        | 126.2        | 115.4        | 120.5        | 125.2        | 126.4        | 126.9        | 126.7        | 118.9        | 115.7        | <b>122.8</b> | 124.6        | 115.2       | 70.9        | 73.4        | 106.0       | 99.2        | 89.2        | 83.2        |
| 6d6o | 89.5           | 86.6        | 82.0        | 123.4        | 108.5        | 109.8        | 119.1        | 103.8        | 118.6        | 107.8        | 122.6        | 115.0        | 124.2        | <b>124.9</b> | 120.3       | 91.8        | 81.8        | 92.3        | 105.2       | 83.9        | 88.4        |
| 6d6p | 83.0           | 84.1        | 80.1        | 97.6         | 87.6         | 92.9         | 95.6         | 96.9         | 98.4         | 101.0        | 102.2        | 97.1         | 100.9        | 98.1         | <b>97.0</b> | 74.5        | 82.7        | 90.7        | 87.9        | 83.9        | 83.1        |
| 6mvm | 90.9           | 77.8        | 89.0        | 88.9         | 82.8         | 86.4         | 86.2         | 82.1         | 83.4         | 85.0         | 81.2         | 78.6         | 78.4         | 84.2         | 83.0        | <b>88.9</b> | 75.7        | 91.1        | 92.8        | 82.9        | 77.7        |
| 6mvm | 83.5           | 80.5        | 79.7        | 73.3         | 71.1         | 73.0         | 75.2         | 74.9         | 71.7         | 73.6         | 73.8         | 80.7         | 81.3         | 74.7         | 79.0        | 81.6        | <b>81.7</b> | 83.9        | 79.1        | 81.7        | 67.1        |
| 6mwh | 85.7           | 80.2        | 80.1        | 85.4         | 81.7         | 85.6         | 83.0         | 83.7         | 83.2         | 88.4         | 78.8         | 79.2         | 78.1         | 79.1         | 77.7        | 79.8        | 82.4        | <b>91.5</b> | 88.2        | 85.8        | 71.4        |
| 6mwl | 90.3           | 87.2        | 83.9        | 83.3         | 82.2         | 83.0         | 83.3         | 84.4         | 82.8         | 85.7         | 81.1         | 79.6         | 80.8         | 77.3         | 77.6        | 82.6        | 88.8        | 88.5        | <b>84.2</b> | 89.7        | 73.0        |
| 6mww | 90.6           | 87.3        | 84.3        | 80.3         | 84.8         | 85.9         | 81.0         | 84.1         | 81.6         | 84.3         | 78.3         | 81.3         | 79.2         | 84.0         | 79.0        | 92.4        | 84.4        | 93.9        | 93.8        | <b>92.7</b> | 83.4        |
| 6mwz | 83.0           | 83.6        | 86.5        | 85.2         | 83.7         | 89.4         | 83.4         | 87.1         | 82.5         | 84.8         | 83.6         | 79.9         | 80.8         | 83.1         | 78.4        | 96.8        | 88.7        | 96.4        | 90.7        | 95.5        | <b>84.5</b> |

**Table S7: Cross-Docking Results for the Molecular Docking with Gold GoldScore scoring function for all LasR Structures**

| LIG  | Gold - GoldScore |             |             |             |             |             |             |              |             |             |             |             |             |             |             |             |             |             |             |             |             |
|------|------------------|-------------|-------------|-------------|-------------|-------------|-------------|--------------|-------------|-------------|-------------|-------------|-------------|-------------|-------------|-------------|-------------|-------------|-------------|-------------|-------------|
|      | Receptors        |             |             |             |             |             |             |              |             |             |             |             |             |             |             |             |             |             |             |             |             |
|      | 2uv0             | 3ix3        | 4ng2        | 3ix4        | 3ix8        | 3jpu        | 6d6a        | 6d6b         | 6d6c        | 6d6d        | 6d6l        | 6d6m        | 6d6n        | 6d6o        | 6d6p        | 6mvm        | 6mvm        | 6mwh        | 6mwl        | 6mww        | 6mwz        |
| 2uv0 | 71.4             | 70.3        | 69.2        | 71.1        | 63.3        | 68.2        | 69.4        | 70.5         | 69.2        | 66.1        | 63.4        | 56.8        | 62.8        | 61.4        | 62.7        | 71.8        | 72.0        | 67.5        | 66.0        | 68.6        | 72.6        |
| 3ix3 | 72.3             | <b>72.5</b> | 69.7        | 68.1        | 63.5        | 67.8        | 69.2        | 72.0         | 66.2        | 69.1        | 60.6        | 55.5        | 60.7        | 62.1        | 64.5        | 72.9        | 72.5        | 65.0        | 65.6        | 67.4        | 72.0        |
| 4ng2 | 69.0             | 67.2        | <b>66.9</b> | 67.9        | 63.7        | 68.8        | 69.2        | 68.7         | 67.2        | 70.7        | 64.9        | 57.3        | 61.7        | 63.5        | 62.4        | 68.5        | 69.6        | 67.1        | 61.3        | 66.9        | 72.8        |
| 3ix4 | 77.0             | 78.6        | 72.2        | <b>98.2</b> | 92.3        | 91.9        | 96.9        | 95.9         | 96.7        | 98.3        | 91.5        | 85.6        | 93.6        | 94.2        | 92.2        | 80.2        | 67.4        | 89.4        | 82.4        | 74.5        | 83.7        |
| 3ix8 | 86.4             | 82.3        | 74.9        | 95.2        | <b>96.3</b> | 93.8        | 93.2        | 98.5         | 95.4        | 94.5        | 92.1        | 84.6        | 92.0        | 92.0        | 90.8        | 82.3        | 69.1        | 87.9        | 83.1        | 75.9        | 75.0        |
| 3jpu | 73.8             | 70.1        | 72.5        | 95.4        | 91.3        | <b>91.9</b> | 91.6        | 94.4         | 93.7        | 95.7        | 90.7        | 84.7        | 91.4        | 92.1        | 89.3        | 79.4        | 46.0        | 84.7        | 80.5        | 73.7        | 76.0        |
| 6d6a | 76.7             | 76.2        | 72.6        | 93.9        | 88.5        | 86.5        | <b>92.7</b> | 92.3         | 90.7        | 93.1        | 90.0        | 83.1        | 91.3        | 92.3        | 89.4        | 74.5        | 61.9        | 83.8        | 77.8        | 76.7        | 85.1        |
| 6d6b | 82.1             | 78.3        | 74.1        | 101.1       | 97.0        | 92.7        | 99.9        | <b>101.9</b> | 99.8        | 99.6        | 95.6        | 84.0        | 95.4        | 96.8        | 94.8        | 82.2        | 75.1        | 93.4        | 84.0        | 76.3        | 85.5        |
| 6d6c | 85.4             | 85.5        | 73.4        | 99.9        | 93.3        | 92.4        | 98.6        | 99.0         | <b>98.2</b> | 99.6        | 96.7        | 46.3        | 96.1        | 98.3        | 94.3        | 81.7        | 78.4        | 92.6        | 91.0        | 78.2        | 84.5        |
| 6d6d | 80.2             | 75.2        | 73.9        | 97.3        | 92.0        | 90.4        | 98.4        | 97.2         | 95.2        | <b>95.9</b> | 92.9        | 87.3        | 94.4        | 93.3        | 93.4        | 81.8        | 66.9        | 88.8        | 81.9        | 79.3        | 80.6        |
| 6d6l | 54.0             | 60.3        | 69.5        | 96.4        | 87.1        | 88.5        | 93.7        | 94.1         | 89.3        | 94.4        | <b>90.6</b> | 84.1        | 89.6        | 92.0        | 90.8        | 77.2        | 47.5        | 85.6        | 83.1        | 72.4        | 76.8        |
| 6d6m | 65.5             | 65.9        | 70.2        | 96.1        | 86.5        | 86.8        | 94.2        | 95.9         | 95.1        | 95.0        | 92.0        | <b>83.8</b> | 90.3        | 94.5        | 90.3        | 74.9        | 64.4        | 84.4        | 79.4        | 77.0        | 88.2        |
| 6d6n | 66.7             | 72.2        | 68.5        | 96.5        | 91.1        | 94.0        | 98.4        | 97.5         | 96.8        | 96.6        | 96.2        | 81.5        | <b>96.8</b> | 95.5        | 96.1        | 80.6        | 73.8        | 89.2        | 83.9        | 81.6        | 85.1        |
| 6d6o | 67.8             | 77.8        | 76.6        | 92.7        | 93.2        | 92.6        | 93.1        | 96.0         | 92.7        | 95.7        | 97.1        | 85.2        | 96.2        | <b>96.6</b> | 93.8        | 83.9        | 71.4        | 93.2        | 82.5        | 82.8        | 93.7        |
| 6d6p | 77.1             | 77.9        | 73.8        | 80.3        | 73.4        | 73.9        | 78.8        | 79.8         | 78.2        | 81.4        | 80.5        | 76.0        | 85.0        | 85.9        | <b>85.2</b> | 65.9        | 69.0        | 71.6        | 70.4        | 67.6        | 77.2        |
| 6mvm | 72.7             | 76.1        | 74.3        | 73.1        | 68.7        | 71.1        | 72.7        | 70.3         | 69.0        | 73.4        | 66.9        | 59.9        | 65.6        | 70.9        | 68.6        | <b>76.3</b> | 70.8        | 69.4        | 65.9        | 70.1        | 73.8        |
| 6mvm | 72.9             | 66.9        | 68.7        | 61.5        | 63.3        | 59.8        | 61.6        | 64.1         | 59.7        | 64.1        | 64.8        | 55.0        | 64.6        | 62.2        | 59.0        | 66.8        | <b>70.5</b> | 64.7        | 64.9        | 66.2        | 68.3        |
| 6mwh | 71.7             | 69.3        | 66.4        | 66.4        | 66.9        | 69.5        | 70.3        | 68.7         | 66.8        | 68.4        | 63.0        | 65.3        | 65.8        | 65.4        | 61.8        | 65.9        | 71.0        | <b>72.9</b> | 68.0        | 66.8        | 72.9        |
| 6mwl | 71.4             | 71.1        | 69.4        | 67.9        | 67.9        | 68.4        | 69.2        | 68.8         | 67.3        | 68.3        | 64.9        | 56.8        | 65.1        | 67.2        | 63.0        | 68.4        | 71.0        | 77.0        | <b>71.0</b> | 75.2        | 72.9        |
| 6mww | 83.8             | 82.2        | 78.6        | 77.7        | 75.3        | 75.4        | 75.5        | 76.1         | 75.2        | 78.3        | 71.4        | 69.5        | 78.3        | 79.2        | 72.0        | 80.2        | 80.9        | 80.1        | 81.7        | <b>83.9</b> | 85.0        |
| 6mwz | 80.6             | 79.3        | 79.6        | 75.9        | 72.6        | 74.0        | 72.6        | 75.3         | 70.7        | 78.9        | 73.7        | 69.8        | 72.6        | 70.8        | 78.1        | 79.1        | 77.8        | 78.1        | 82.0        | 80.2        | <b>84.3</b> |

**Table S8: Cross-Docking Results for the Molecular Docking with Gold ChemScore scoring function for all LasR Structures**

| LIG  | Gold - ChemScore |             |             |             |             |             |             |             |             |             |             |             |             |             |             |             |             |             |             |             |             |
|------|------------------|-------------|-------------|-------------|-------------|-------------|-------------|-------------|-------------|-------------|-------------|-------------|-------------|-------------|-------------|-------------|-------------|-------------|-------------|-------------|-------------|
|      | Receptors        |             |             |             |             |             |             |             |             |             |             |             |             |             |             |             |             |             |             |             |             |
|      | 2uv0             | 3ix3        | 4ng2        | 3ix4        | 3ix8        | 3jpu        | 6d6a        | 6d6b        | 6d6c        | 6d6d        | 6d6l        | 6d6m        | 6d6n        | 6d6o        | 6d6p        | 6mvm        | 6mvm        | 6mwh        | 6mwl        | 6mww        | 6mwz        |
| 2uv0 | 39.5             | 38.1        | 36.5        | 31.4        | 37.8        | 30.7        | 33.3        | 31.7        | 31.1        | 33.2        | 34.3        | 33.0        | 33.5        | 31.5        | 34.0        | 40.2        | 37.5        | 29.7        | 37.1        | 33.1        | 39.1        |
| 3ix3 | 40.2             | <b>39.6</b> | 38.3        | 31.9        | 37.5        | 31.4        | 30.8        | 32.9        | 37.4        | 33.2        | 34.7        | 34.9        | 34.2        | 31.9        | 34.5        | 40.6        | 39.0        | 29.8        | 39.0        | 32.8        | 40.3        |
| 4ng2 | 39.4             | 39.5        | <b>37.1</b> | 34.5        | 33.2        | 34.8        | 32.7        | 35.2        | 34.9        | 32.8        | 36.5        | 35.6        | 34.6        | 32.6        | 33.2        | 40.2        | 39.3        | 36.2        | 38.1        | 39.2        | 41.0        |
| 3ix4 | 45.9             | 46.5        | 41.6        | <b>58.2</b> | 52.8        | 53.0        | 57.9        | 58.0        | 56.9        | 59.0        | 57.1        | 54.2        | 55.9        | 54.4        | 56.5        | 44.9        | 45.8        | 52.7        | 51.9        | 52.2        | 51.3        |
| 3ix8 | 54.6             | 54.6        | 52.2        | 59.8        | <b>59.5</b> | 58.5        | 57.2        | 58.6        | 58.9        | 59.4        | 55.8        | 55.3        | 56.6        | 57.3        | 56.2        | 51.4        | 52.3        | 58.0        | 56.1        | 45.6        | 51.9        |
| 3jpu | 51.9             | 53.6        | 47.1        | 60.6        | 59.5        | <b>58.3</b> | 59.2        | 59.4        | 59.4        | 60.4        | 54.8        | 55.1        | 56.2        | 55.3        | 57.5        | 50.8        | 44.0        | 56.7        | 53.1        | 44.8        | 52.1        |
| 6d6a | 41.9             | 45.4        | 42.6        | 54.4        | 51.9        | 53.0        | <b>55.9</b> | 56.2        | 54.8        | 55.8        | 55.6        | 52.8        | 51.8        | 55.9        | 52.8        | 41.2        | 46.1        | 52.6        | 51.5        | 47.5        | 47.4        |
| 6d6b | 43.5             | 42.0        | 40.0        | 56.6        | 50.0        | 52.5        | 55.2        | <b>54.5</b> | 51.1        | 55.6        | 57.1        | 53.2        | 53.4        | 56.4        | 53.6        | 38.8        | 44.3        | 50.1        | 50.2        | 42.0        | 50.3        |
| 6d6c | 46.8             | 46.1        | 42.9        | 59.5        | 54.7        | 54.8        | 58.4        | 58.7        | <b>57.8</b> | 60.1        | 55.5        | 52.9        | 53.7        | 56.7        | 55.3        | 39.8        | 46.9        | 54.2        | 52.4        | 45.0        | 51.2        |
| 6d6d | 47.3             | 43.1        | 40.6        | 59.8        | 55.5        | 55.7        | 58.9        | 56.4        | 58.1        | <b>60.1</b> | 54.9        | 54.2        | 54.8        | 57.2        | 56.6        | 41.3        | 44.7        | 52.8        | 54.9        | 41.3        | 47.7        |
| 6d6l | 43.3             | 40.7        | 37.7        | 55.5        | 52.9        | 53.3        | 55.8        | 56.2        | 55.7        | 58.0        | <b>53.8</b> | 53.8        | 53.6        | 55.3        | 54.5        | 40.0        | 38.1        | 51.2        | 48.3        | 45.1        | 49.3        |
| 6d6m | 39.7             | 38.2        | 40.0        | 55.6        | 52.5        | 53.0        | 57.1        | 56.2        | 55.0        | 56.4        | 52.6        | <b>51.9</b> | 56.9        | 56.1        | 54.7        | 35.3        | 40.1        | 50.9        | 50.3        | 45.5        | 45.1        |
| 6d6n | 41.8             | 41.5        | 39.1        | 56.8        | 52.9        | 53.3        | 55.9        | 55.6        | 54.5        | 57.4        | 54.0        | 53.1        | <b>55.9</b> | 53.8        | 54.9        | 38.8        | 35.6        | 52.0        | 50.4        | 43.6        | 47.4        |
| 6d6o | 42.1             | 45.0        | 37.6        | 55.5        | 50.9        | 50.7        | 56.3        | 54.5        | 55.2        | 51.6        | 54.2        | 52.3        | 53.5        | <b>55.2</b> | 53.7        | 43.9        | 41.4        | 45.5        | 49.5        | 40.9        | 48.4        |
| 6d6p | 39.7             | 39.0        | 40.5        | 45.0        | 41.7        | 40.7        | 42.5        | 44.1        | 42.9        | 45.3        | 43.4        | 40.9        | 43.0        | 42.7        | <b>42.6</b> | 37.5        | 36.7        | 42.5        | 40.3        | 38.6        | 39.1        |
| 6mvm | 37.6             | 38.4        | 40.5        | 32.6        | 32.7        | 32.7        | 33.5        | 33.4        | 34.7        | 34.2        | 35.5        | 33.1        | 35.6        | 35.0        | 35.7        | <b>41.3</b> | 34.1        | 33.0        | 41.7        | 35.3        | 41.5        |
| 6mvm | 37.0             | 36.7        | 34.8        | 35.1        | 35.9        | 34.2        | 34.3        | 31.5        | 30.8        | 33.6        | 34.9        | 33.6        | 34.8        | 33.8        | 33.5        | 37.1        | <b>36.1</b> | 35.9        | 36.1        | 37.6        | 38.0        |
| 6mwh | 42.4             | 42.3        | 41.0        | 39.3        | 39.8        | 39.2        | 39.9        | 39.5        | 40.9        | 40.0        | 39.4        | 38.2        | 37.0        | 40.2        | 39.1        | 41.9        | 44.0        | <b>40.7</b> | 41.9        | 40.1        | 46.5        |
| 6mwl | 43.4             | 42.1        | 41.0        | 40.6        | 40.1        | 39.6        | 38.9        | 38.0        | 39.3        | 38.7        | 37.4        | 36.6        | 37.8        | 38.8        | 36.3        | 42.2        | 42.4        | 41.8        | <b>41.5</b> | 41.2        | 47.8        |
| 6mww | 39.6             | 41.6        | 40.2        | 37.7        | 41.6        | 40.4        | 39.4        | 40.6        | 39.7        | 39.0        | 39.4        | 38.7        | 36.5        | 40.5        | 40.1        | 45.2        | 41.8        | 42.2        | 43.1        | <b>43.1</b> | 48.2        |
| 6mwz | 40.6             | 40.7        | 38.9        | 37.6        | 38.7        | 40.5        | 39.8        | 41.4        | 38.0        | 39.1        | 37.9        | 38.4        | 38.8        | 38.4        | 39.1        | 42.7        | 41.2        | 38.8        | 43.5        | 41.7        | <b>52.4</b> |

**Table S9:** Cross-Docking Results for the Molecular Docking with Gold ChemScore scoring function for all LasR Structures

| LIG  | Gold -ASP |      |      |      |      |      |      |      |      |      |      |      |      |      |      |      |      |      |      |      |      |
|------|-----------|------|------|------|------|------|------|------|------|------|------|------|------|------|------|------|------|------|------|------|------|
|      | Receptors |      |      |      |      |      |      |      |      |      |      |      |      |      |      |      |      |      |      |      |      |
|      | 2uv0      | 3ix3 | 4ng2 | 3ix4 | 3ix8 | 3jpu | 6d6a | 6d6b | 6d6c | 6d6d | 6d6l | 6d6m | 6d6n | 6d6o | 6d6p | 6mvm | 6mvm | 6mwh | 6mwl | 6mww | 6mwz |
| 2uv0 | 46.2      | 43.8 | 45.4 | 39.9 | 40.2 | 39.6 | 42.9 | 44.1 | 43.0 | 40.6 | 43.4 | 43.0 | 42.0 | 42.5 | 42.7 | 47.0 | 44.5 | 46.0 | 47.5 | 40.0 | 51.3 |
| 3ix3 | 47.3      | 44.6 | 45.6 | 42.3 | 42.6 | 39.7 | 43.6 | 40.9 | 43.7 | 45.0 | 43.1 | 43.6 | 43.0 | 42.1 | 42.6 | 45.3 | 44.6 | 46.7 | 45.3 | 43.6 | 51.1 |
| 4ng2 | 46.2      | 44.5 | 45.8 | 42.9 | 41.1 | 39.5 | 43.6 | 40.7 | 43.1 | 42.5 | 43.8 | 41.3 | 41.8 | 42.9 | 40.9 | 47.6 | 43.8 | 43.2 | 45.2 | 41.6 | 49.7 |
| 3ix4 | 55.9      | 57.6 | 55.4 | 70.1 | 63.2 | 64.3 | 68.9 | 70.5 | 69.0 | 70.0 | 69.9 | 67.1 | 66.3 | 69.7 | 68.2 | 50.9 | 51.9 | 63.3 | 61.0 | 51.9 | 61.4 |
| 3ix8 | 54.2      | 53.8 | 50.6 | 61.5 | 59.4 | 58.8 | 61.2 | 61.3 | 60.0 | 61.5 | 60.3 | 58.8 | 59.9 | 61.0 | 59.7 | 48.7 | 48.0 | 59.2 | 57.6 | 40.9 | 58.5 |
| 3jpu | 51.2      | 52.4 | 46.1 | 64.0 | 61.1 | 61.2 | 62.1 | 61.9 | 62.0 | 63.5 | 62.5 | 59.7 | 61.1 | 61.7 | 62.0 | 49.7 | 42.6 | 59.5 | 58.4 | 38.9 | 56.4 |
| 6d6a | 52.5      | 53.6 | 54.0 | 67.2 | 60.8 | 62.9 | 67.4 | 67.8 | 67.9 | 67.8 | 67.1 | 64.7 | 66.7 | 68.3 | 66.3 | 48.4 | 53.1 | 61.8 | 60.5 | 48.3 | 61.1 |
| 6d6b | 60.3      | 61.8 | 55.2 | 72.2 | 65.2 | 67.3 | 71.3 | 69.6 | 70.4 | 70.1 | 69.4 | 69.5 | 67.9 | 69.3 | 70.0 | 52.6 | 52.5 | 62.8 | 63.3 | 51.3 | 64.8 |
| 6d6c | 55.4      | 56.7 | 55.4 | 70.8 | 64.4 | 63.5 | 68.7 | 71.6 | 69.3 | 72.4 | 68.6 | 69.3 | 68.2 | 69.9 | 69.2 | 51.0 | 49.6 | 60.7 | 63.0 | 51.7 | 66.4 |
| 6d6d | 60.9      | 60.6 | 57.5 | 72.5 | 65.0 | 66.8 | 70.4 | 71.2 | 70.9 | 70.5 | 70.4 | 68.9 | 69.5 | 70.7 | 70.6 | 51.0 | 51.3 | 63.9 | 63.7 | 47.2 | 62.3 |
| 6d6l | 48.5      | 53.0 | 45.8 | 70.0 | 62.3 | 63.5 | 67.0 | 67.1 | 67.3 | 68.9 | 69.6 | 67.5 | 68.0 | 69.1 | 67.8 | 47.2 | 45.3 | 55.7 | 60.8 | 45.6 | 55.2 |
| 6d6m | 39.8      | 44.3 | 43.3 | 69.6 | 60.2 | 61.6 | 66.7 | 66.1 | 65.9 | 65.2 | 66.7 | 66.5 | 67.4 | 67.9 | 67.6 | 48.0 | 41.8 | 56.1 | 59.8 | 43.5 | 59.7 |
| 6d6n | 45.5      | 47.8 | 50.4 | 68.7 | 61.7 | 64.7 | 70.9 | 70.8 | 69.4 | 69.4 | 68.3 | 67.2 | 69.1 | 70.2 | 68.9 | 50.1 | 39.1 | 57.8 | 61.5 | 45.1 | 60.1 |
| 6d6o | 47.7      | 46.9 | 46.5 | 59.8 | 57.1 | 56.9 | 64.4 | 60.2 | 58.8 | 58.1 | 67.8 | 64.4 | 64.1 | 68.2 | 66.3 | 52.9 | 43.6 | 57.4 | 57.9 | 43.1 | 62.0 |
| 6d6p | 44.2      | 44.4 | 43.3 | 60.0 | 51.1 | 51.9 | 59.0 | 57.1 | 59.6 | 60.8 | 60.4 | 59.5 | 60.3 | 61.5 | 61.9 | 40.1 | 44.2 | 51.1 | 53.4 | 42.4 | 54.8 |
| 6mvm | 45.7      | 43.2 | 47.2 | 43.1 | 43.7 | 42.3 | 49.0 | 43.3 | 42.5 | 43.5 | 44.6 | 45.2 | 43.6 | 43.5 | 44.9 | 47.1 | 41.3 | 45.0 | 48.8 | 43.6 | 52.7 |
| 6mvm | 44.9      | 41.8 | 42.5 | 42.0 | 38.8 | 37.9 | 42.7 | 40.8 | 40.0 | 41.0 | 40.6 | 40.4 | 40.0 | 40.7 | 41.0 | 43.7 | 42.0 | 44.2 | 44.8 | 41.4 | 47.5 |
| 6mwh | 44.8      | 42.5 | 44.0 | 46.9 | 43.9 | 44.9 | 46.3 | 45.4 | 45.8 | 43.5 | 44.5 | 45.0 | 42.8 | 43.7 | 42.4 | 44.9 | 44.6 | 49.8 | 48.0 | 43.8 | 52.8 |
| 6mwl | 46.0      | 44.0 | 45.0 | 44.7 | 43.8 | 43.6 | 44.4 | 44.2 | 44.3 | 43.8 | 45.6 | 43.6 | 44.3 | 46.0 | 45.7 | 46.0 | 46.2 | 46.9 | 46.5 | 43.6 | 53.5 |
| 6mww | 51.7      | 49.2 | 49.9 | 48.2 | 49.0 | 49.0 | 49.4 | 49.2 | 49.1 | 49.4 | 49.2 | 48.8 | 47.6 | 47.6 | 46.3 | 52.1 | 53.2 | 51.8 | 55.7 | 50.8 | 61.3 |
| 6mwz | 51.7      | 50.5 | 51.3 | 49.9 | 50.2 | 47.0 | 51.1 | 51.0 | 50.9 | 51.3 | 49.8 | 49.5 | 47.3 | 48.2 | 49.6 | 52.4 | 53.4 | 52.0 | 53.2 | 51.3 | 61.5 |

**Table S10:** Characterization of LasR Inhibitors used in the optimization of the Virtual Screening Protocol

|    | Mol_Name            | Source     | REF  | SMILE                                                        |
|----|---------------------|------------|------|--------------------------------------------------------------|
| 1  | C_1                 | Literature | [1]  | CCCCC(=O)CC(=O)NC1CCOC1=O                                    |
| 2  | C_2a                | Literature | [2]  | Clc1ccc(cc1)C1OC(=O)c2c(C1)cc(cc2)C(=O)Nc1ccc(c(c1)C)C       |
| 3  | C_3                 | Literature | [2]  | CCC(C)C1=CC=C(OCCOC2=C(\C=N/N3C=NN=C3)C=C(C1)C=C2)C=C1       |
| 4  | C_7a                | Literature | [2]  | O=C(CCCS(=O)(=O)C1=CC=CC=C1)NC1COC(=O)C1                     |
| 5  | C_8                 | Literature | [1]  | O=C(Cc1ccc(cc1)Br)NC1CCOC1=O                                 |
| 6  | C_9                 | Literature | [1]  | O=C(NC1CCOC1=O)CCCc1c[nH]e2c1cccc2                           |
| 7  | C_A3                | Literature | [1]  | CCCCCCCC(=O)NC1CCOC1=O                                       |
| 8  | C_A4                | Literature | [1]  | CCCCCCCCC(=O)NC1CCOC1=O                                      |
| 9  | C_B11               | Literature | [1]  | O=C(NC1CCOC1=O)CCC1CCCCC1                                    |
| 10 | C_B14               | Literature | [1]  | O=C(NC1CCOC1=O)CCc1cc2c([nH]1)cccc2                          |
| 11 | C_B7                | Literature | [1]  | O=C(NC1CCOC1=O)CCc1ccc(cc1)Br                                |
| 12 | Betulin             | Literature | [3]  | CC(=C)C1CCC2(C1C3CCC4C5(CCC(C(C5CCC4(C3(CC2)C)C)(C)C)O)C)CO  |
| 13 | Butein              | Literature | [4]  | C1=CC(=C(C=C1C=CC(=O)C2=C(C=C(C=C2)O)O)O)O                   |
| 14 | C_C10               | Literature | [1]  | O=C(Cc1ccc(cc1)I)NC1CCOC1=O                                  |
| 15 | C_C11               | Literature | [1]  | O=C(NC1CCOC1=O)Cc1cccc(c1)I                                  |
| 16 | C_C14               | Literature | [1]  | O=C(N[C]1[C][C]OC1=O)[C]c1cccc(c1)N([O])[O]                  |
| 17 | C19                 | Literature | [5]  | CCCCCCCCCNC(=O)CC(=O)c1cccc1                                 |
| 18 | C1                  | Literature | [6]  | O=c1[nH]cnc2c1nn[nH]2                                        |
| 19 | C20                 | Literature | [5]  | CCCCCCCCCNC(=O)CC(=O)c1cccc1                                 |
| 20 | C27                 | Literature | [5]  | [C][C][C][C][C][C][C][C][C]NC(=O)CC(=O)c1cccc1               |
| 21 | C28                 | Literature | [5]  | [C][C][C][C][C][C][C][C][C]NC(=O)CC(=O)c1cccc1               |
| 22 | C29                 | Literature | [5]  | [C][C][C][C][C][C][C][C][C]NC(=O)CC(=O)c1cccc1               |
| 23 | C39                 | Literature | [5]  | CCCCCCCCCNC(=O)CC(=O)c1cccc1                                 |
| 24 | C40                 | Literature | [5]  | CCCCCCCCCNC(=O)CC(=O)c1cccc1                                 |
| 25 | C41                 | Literature | [5]  | CCCCCCCCCNC(=O)CC(=O)c1cccc1                                 |
| 26 | C42                 | Literature | [5]  | CCCCCCCCCNC(=O)CC(=O)c1cccc1                                 |
| 27 | C43                 | Literature | [5]  | C1=CC=C(C(=O)CC(=O)NCCCCCCCCC)S1                             |
| 28 | C44                 | Literature | [5]  | CCCCCCCCCNC(=O)CC(=O)c1cccc1                                 |
| 29 | C_C6                | Literature | [1]  | O=C(NC1CCOC1=O)Cc1cccc(c1)Cl                                 |
| 30 | Catechin 7-xyloside | Literature | [4]  | C1C(C(OC2=CC(=CC(=C21)O)OC3C(C(CO3)O)O)O)C4=CC(=C(C=C4)O)O)O |
| 31 | C_C8                | Literature | [1]  | O=C(NC1CCOC1=O)Cc1cccc(c1)Br                                 |
| 32 | Chlorogenic acid    | Literature | [7]  | C1C(C(C(CC1(C(=O)O)O)OC(=O)C=CC2=CC(=C(C=C2)O)O)O)O          |
| 33 | CHEMBL122890        | ChEMBL     | [8]  | C=CCSS/C=C/C[S+][[O-]]CC=C                                   |
| 34 | CHEMBL1818521       | ChEMBL     | [9]  | O=C(CCCCCCCCCCNC(=O)CC)CC(=O)N[C@H]1CCOC1=O                  |
| 35 | CHEMBL1818522       | ChEMBL     | [9]  | CCCCCCCCC(=O)CC(=O)NC1CCCCC1=O                               |
| 36 | CHEMBL1818523       | ChEMBL     | [9]  | CCCCCCCCCCCCCn1nnc(CC(=O)O)n1                                |
| 37 | CHEMBL1818524       | ChEMBL     | [9]  | CCCCCCCCCCCC(=O)N[C@H]1CCSC1=O                               |
| 38 | CHEMBL1823930       | ChEMBL     | [10] | CCCC(=O)CC(=O)N[C@H]1CCSC1=O                                 |



|    |               |            |      |                                                                |
|----|---------------|------------|------|----------------------------------------------------------------|
| 39 | CHEMBL1823933 | ChEMBL     | [11] | <chem>O=C(CCCCCCCCN=C=S)CC(=O)N[C@H]1CCOC1=O</chem>            |
| 40 | CHEMBL1823934 | ChEMBL     | [11] | <chem>O=C(CCCCCCCCCCN=C=S)CC(=O)N[C@H]1CCOC1=O</chem>          |
| 41 | CHEMBL1823935 | ChEMBL     | [11] | <chem>O=C(CCCCCCCCCCN=C=S)CC(=O)N[C@H]1CCOC1=O</chem>          |
| 42 | CHEMBL1823936 | ChEMBL     | [11] | <chem>O=C(CCCCCCCCN(C(=O)CBr)CC(=O)N[C@H]1CCOC1=O</chem>       |
| 43 | CHEMBL1823937 | ChEMBL     | [11] | <chem>O=C(CCCCCCCCN(C(=O)CBr)CC(=O)N[C@H]1CCOC1=O</chem>       |
| 44 | CHEMBL1823938 | ChEMBL     | [11] | <chem>O=C(CCCCCCCCN(C(=O)CBr)CC(=O)N[C@H]1CCOC1=O</chem>       |
| 45 | CHEMBL1823939 | ChEMBL     | [11] | <chem>O=C(CCCCCCCCN(C(=O)CCl)CC(=O)N[C@H]1CCOC1=O</chem>       |
| 46 | CHEMBL1823941 | ChEMBL     | [11] | <chem>O=C(CCCCCCCCN(C(=O)CCl)CC(=O)N[C@H]1CCOC1=O</chem>       |
| 47 | CHEMBL1823945 | ChEMBL     | [8]  | <chem>O=C(Nc1cccc1NC(=O)c1cccc(Cl)c1)c1cccc(Cl)c1</chem>       |
| 48 | CHEMBL258912  | ChEMBL     | [8]  | <chem>O=C(Cc1cccc(I)c1)N[C@H]1CCOC1=O</chem>                   |
| 49 | CHEMBL259352  | ChEMBL     | [11] | <chem>CCCCCCCC(=O)N[C@H]1CCOC1=O</chem>                        |
| 50 | CHEMBL264944  | ChEMBL     | [11] | <chem>O=C(CCc1ccc(Br)cc1)N[C@H]1CCOC1=O</chem>                 |
| 51 | CHEMBL3235593 | ChEMBL     | [12] | <chem>CCCCCCCC(=O)CC(=O)O[C@H]1CCOC1=O</chem>                  |
| 52 | CHEMBL3403857 | ChEMBL     | [8]  | <chem>CCCCc1cn(CC(=O)N[C@H]2CCOC2=O)nn1</chem>                 |
| 53 | CHEMBL3403871 | ChEMBL     | [8]  | <chem>Nc1cccc(-n2cc(CCC(=O)N[C@H]3CCOC3=O)nn2)c1</chem>        |
| 54 | CHEMBL374107  | ChEMBL     | [8]  | <chem>Nc1nc(O)c2[nH]nnc2n1</chem>                              |
| 55 | CHEMBL405298  | ChEMBL     | [9]  | <chem>O=C(Cc1cccc([N+](=O)[O-])c1)N[C@H]1CCOC1=O</chem>        |
| 56 | CHEMBL408326  | ChEMBL     | [12] | <chem>CCCCCCCCCS(=O)(=O)N[C@H]1CCOC1=O</chem>                  |
| 57 | CHEMBL4282406 | ChEMBL     | [8]  | <chem>CCCCCCCCOc1ccc(C(=O)N[C@H]2CCOC2=O)cc1</chem>            |
| 58 | CHEMBL4284314 | ChEMBL     | [8]  | <chem>O=C(N[C@H]1CCOC1=O)c1ccc(-n2cc(CSc3ccccc3)nn2)cc1</chem> |
| 59 | CHEMBL4285396 | ChEMBL     | [12] | <chem>CCCCCCCC(=O)CC(=O)NCC1CCCO1</chem>                       |
| 60 | CHEMBL4286873 | ChEMBL     | [8]  | <chem>O=C(CCCC1CCCCC1)N[C@H]1CCOC1=O</chem>                    |
| 61 | CHEMBL4289544 | ChEMBL     | [8]  | <chem>O=C(CCSc1ccc(Cl)cc1)N[C@H]1CCOC1=O</chem>                |
| 62 | CHEMBL4293495 | ChEMBL     | [8]  | <chem>CCCCCCCN(C(=O)CC(=O)c1cccc1</chem>                       |
| 63 | CHEMBL437     | ChEMBL     | [8]  | <chem>Nc1ccc(S(=O)(=O)Nc2nccs2)cc1</chem>                      |
| 64 | CHEMBL463321  | ChEMBL     | [11] | <chem>CCCCC(=O)CC(=O)N[C@H]1CCOC1=O</chem>                     |
| 65 | CHEMBL468624  | ChEMBL     | [11] | <chem>O=C(Cc1ccc(C(F)(F)F)cc1)N[C@H]1CCOC1=O</chem>            |
| 66 | CHEMBL468790  | ChEMBL     | [11] | <chem>O=C(Cc1ccc(I)cc1)N[C@H]1CCOC1=O</chem>                   |
| 67 | CHEMBL473592  | ChEMBL     | [13] | <chem>O=C(CC(=O)N[C@H]1CCOC1=O)Cc1ccccc1</chem>                |
| 68 | CHEMBL503197  | ChEMBL     | [11] | <chem>O=C(COc1ccc(OC(F)(F)F)cc1)N[C@H]1CCOC1=O</chem>          |
| 69 | CHEMBL573744  | ChEMBL     | [13] | <chem>O=C(CCCc1c[nH]c2ccccc12)N[C@H]1CCOC1=O</chem>            |
| 70 | CHEMBL573745  | ChEMBL     | [13] | <chem>O=C(CC1C=CCC1)N[C@H]1CCOC1=O</chem>                      |
| 71 | CHEMBL575294  | ChEMBL     | [13] | <chem>O=C(Cc1ccc(Br)cc1)N[C@H]1CCOC1=O</chem>                  |
| 72 | CHEMBL584972  | ChEMBL     | [13] | <chem>CCCCCCC(=O)N[C@H]1CCOC1=O</chem>                         |
| 73 | CHEMBL8755    | ChEMBL     | [9]  | <chem>CCCCCCCCCCCC(=O)N[C@H]1CCOC1=O</chem>                    |
| 74 | CHEMBL8799    | ChEMBL     | [11] | <chem>CCCCCCCCCCCC(=O)N[C@H]1CCOC1=O</chem>                    |
| 75 | Chlorzoxazone | Literature | [14] | <chem>C1=CC2=C(C=C1Cl)NC(=O)O2</chem>                          |
| 76 | C_D15         | Literature | [1]  | <chem>O=C(NC1CCOC1=O)COc1ccc(cc1)OC(F)(F)F</chem>              |
| 77 | C_E16         | Literature | [1]  | <chem>O=C(NC1CCOC1=O)COc1cccc(c1)C</chem>                      |
| 78 | C_E20         | Literature | [1]  | <chem>O=C(NC1CCOC1=O)COc1ccc(cc1)Cl</chem>                     |

|    |       |            |     |                                                         |
|----|-------|------------|-----|---------------------------------------------------------|
| 79 | C_E21 | Literature | [1] | <chem>O=C(NC1CCOC1=O)COc1ccc(cc1)Br</chem>              |
| 80 | C_E22 | Literature | [1] | <chem>O=C(NC1CCOC1=O)COc1ccc(cc1)I</chem>               |
| 81 | C_E26 | Literature | [1] | <chem>O=C(NC1CCOC1=O)CCc1ccc(cc1)C</chem>               |
| 82 | C_E27 | Literature | [1] | <chem>O=C(NC1CC=C1=O)CCc1cccc(c1)C</chem>               |
| 83 | C_E28 | Literature | [1] | <chem>COc1ccc(cc1)CCC(=O)NC1CCOC1=O</chem>              |
| 84 | C_E29 | Literature | [1] | <chem>O=C(NC1CCOC1=O)CCc1ccc(cc1)F</chem>               |
| 85 | C_E30 | Literature | [1] | <chem>O=C(NC1CCOC1=O)CCc1ccc(cc1)Cl</chem>              |
| 86 | C_E31 | Literature | [1] | <chem>O=C(NC1CCOC1=O)CCc1ccc(cc1)Cl</chem>              |
| 87 | C_E33 | Literature | [1] | <chem>O=C(NC1CCOC1=O)CCc1cccc(c1)I</chem>               |
| 88 | C_E37 | Literature | [1] | <chem>[O]N(c1ccc(cc1)CCC(=O)N[C]1[C][C]OC1=O)[O]</chem> |
| 89 | C_E38 | Literature | [1] | <chem>O=C(N[C]1[C][C]OC1=O)CCc1cccc(c1)N([O])[O]</chem> |
| 90 | F1    | Literature | [6] | <chem>O[CH](=O)[C]([C]c1cccc(c1)F)N</chem>              |

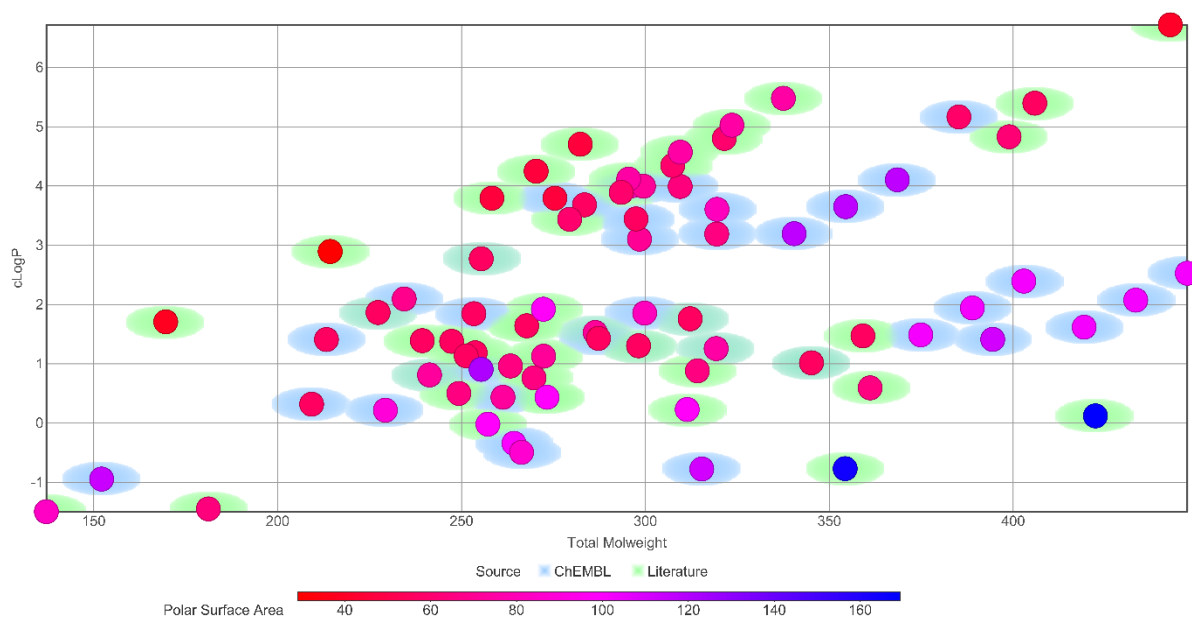

**Figure S2:** General characterization of LasR inhibitors used in this study according to Molecular Weight, cLogP, Polar Surface Area and source (ChEMBL or Literature)

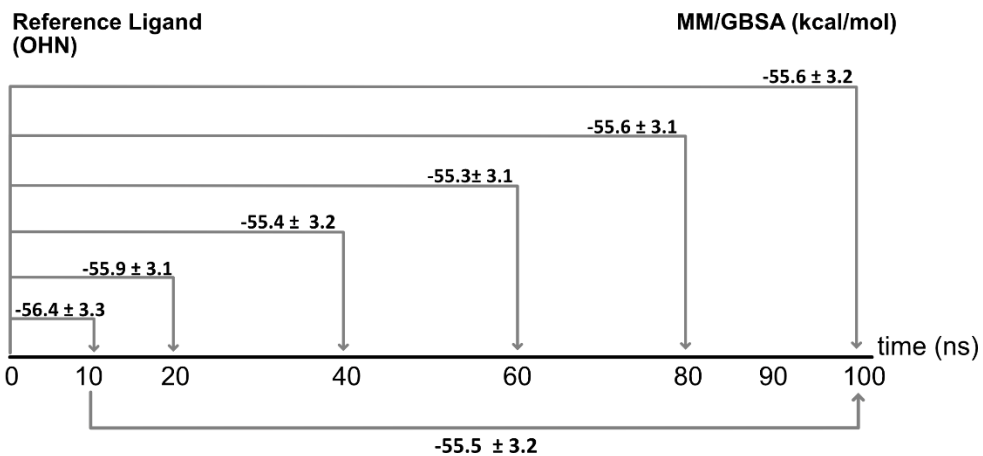

**Figure S3:** MM/GBSA results for different lengths of the MD simulation, showing binding free energy convergence, for the reference ligand, the original autoinducer.

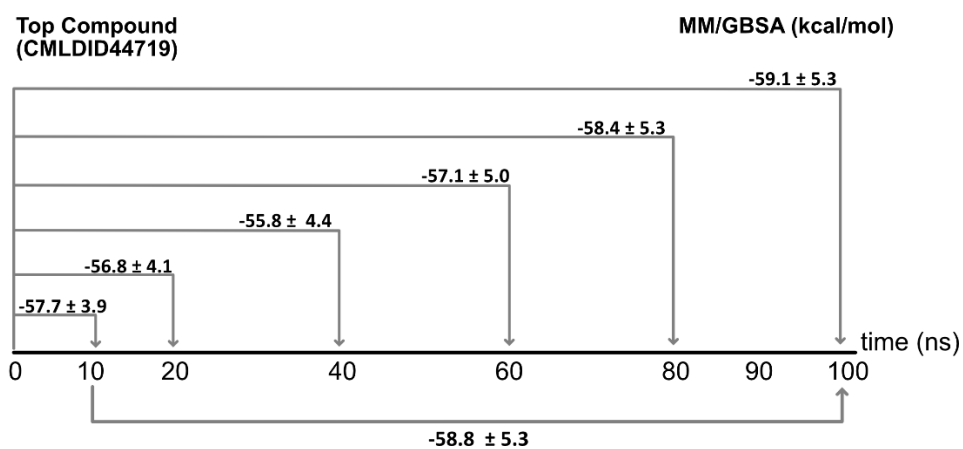

**Figure S4:** MM/GBSA results for different lengths of the MD simulation, showing binding free energy convergence, for the top scoring compound, CMLDID44719.

**Table S11:** Full MM/GBSA results, complementing the information in Figure 10, expressed in kcal/mol. VDW – Van Der Waals; EEL – Electrostatic Energy as calculated by MM force field; EGB – polar solvation free energy; Esurf – apolar solvation free energy.  $\Delta G_{total}$  – Final estimated Free Energy calculated from the remaining terms.

| Source               | Compound      | VDW    | EEL     | EGB    | Esurf | $\Delta G_{gas}$ | $\Delta G_{solvent}$ | MM/GBSA<br>(kcal/mol) |
|----------------------|---------------|--------|---------|--------|-------|------------------|----------------------|-----------------------|
|                      |               |        |         |        |       |                  |                      | $\Delta G_{total}$    |
| PDB                  | C12-HSL       | -52.42 | -47.95  | 52.19  | -7.36 | -100.37          | 44.83                | <b>-55.54 ± 3.17</b>  |
| Known Actives        | C39           | -55.54 | -34.16  | 44.33  | -7.69 | -89.70           | 36.64                | <b>-53.06 ± 3.13</b>  |
|                      | C44           | -59.46 | -40.77  | 47.84  | -8.24 | -100.23          | 39.60                | <b>-60.63 ± 3.61</b>  |
|                      | CHEMBL1818524 | -52.27 | -40.37  | 41.25  | -7.35 | -92.64           | 33.90                | <b>-58.74 ± 3.80</b>  |
|                      | CHEMBL4284314 | -60.56 | -39.38  | 53.00  | -7.69 | -99.94           | 45.30                | <b>-54.64 ± 3.70</b>  |
|                      |               |        |         |        |       |                  |                      |                       |
| Scubidoo             | S18963650     | -58.33 | -55.25  | 61.72  | -7.12 | -113.58          | 54.60                | <b>-58.98 ± 4.34</b>  |
|                      | S2256786      | -54.39 | -12.97  | 32.05  | -6.66 | -67.36           | 25.40                | <b>-41.97 ± 3.30</b>  |
|                      | S2479691      | -57.10 | -203.68 | 210.84 | -6.99 | -260.78          | 203.84               | <b>-56.93 ± 3.30</b>  |
|                      | S10681819     | -46.07 | -377.76 | 380.33 | -6.16 | -423.83          | 374.18               | <b>-49.66 ± 3.29</b>  |
|                      | S160883       | -61.48 | -24.11  | 43.20  | -7.16 | -85.59           | 36.03                | <b>-49.56 ± 2.99</b>  |
| FDA Approved         | Inapsine      | -55.55 | -203.24 | 208.90 | -7.24 | -258.79          | 201.66               | <b>-57.13 ± 3.64</b>  |
|                      | Trazodone     | -56.77 | -189.73 | 200.40 | -6.58 | -246.50          | 193.82               | <b>-52.68 ± 3.06</b>  |
|                      | Salmeterol    | -66.12 | -208.26 | 218.30 | -9.41 | -274.38          | 208.90               | <b>-65.49 ± 5.50</b>  |
|                      | Pletal        | -59.50 | -8.34   | 26.12  | -6.80 | -67.84           | 19.33                | <b>-48.51 ± 3.44</b>  |
| IBS Natural Products | STOCK1N-58049 | -56.27 | -8.05   | 30.25  | -6.65 | -64.32           | 23.60                | <b>-40.72 ± 2.94</b>  |
|                      | STOCK1N-94464 | -57.01 | -172.93 | 189.03 | -7.21 | -229.95          | 181.83               | <b>-48.12 ± 5.13</b>  |
|                      | STOCK1N-76104 | -59.96 | -32.95  | 49.01  | -7.17 | -92.91           | 41.85                | <b>-51.06 ± 3.84</b>  |
|                      | STOCK1N-69966 | -58.14 | -46.61  | 57.62  | -7.10 | -104.75          | 50.52                | <b>-54.23 ± 3.15</b>  |
|                      | STOCK1N-65175 | -58.33 | -55.25  | 61.72  | -7.12 | -113.58          | 54.60                | <b>-58.98 ± 4.34</b>  |
| Chimiotheque         | AB-00033696   | -57.36 | 45.55   | -27.40 | -7.87 | -11.81           | -35.27               | <b>-47.08 ± 6.14</b>  |
|                      | AB-00020966   | -59.19 | 85.44   | -57.59 | -7.69 | 26.25            | -65.28               | <b>-39.02 ± 4.21</b>  |
|                      | AB-00009902   | -64.95 | -30.46  | 53.11  | -8.46 | -95.41           | 44.65                | <b>-50.75 ± 4.26</b>  |
|                      | AB-00013004   | -56.60 | 85.73   | -66.17 | -7.19 | 29.12            | -73.36               | <b>-44.24 ± 4.97</b>  |
|                      | AB-00029524   | -59.34 | -193.37 | 209.80 | -7.86 | -252.72          | 201.94               | <b>-50.78 ± 4.10</b>  |
| Chemoteca            | CMLDID16203   | -68.75 | -28.76  | 48.90  | -8.09 | -97.51           | 40.81                | <b>-56.70 ± 3.01</b>  |
|                      | CMLDID55632   | -61.01 | -32.53  | 48.68  | -7.30 | -93.54           | 41.38                | <b>-52.16 ± 2.91</b>  |
|                      | CMLDID15042   | -59.61 | -30.49  | 43.75  | -7.18 | -90.10           | 36.56                | <b>-53.54 ± 3.21</b>  |
|                      | CMLDID44719   | -71.86 | -44.28  | 65.68  | -8.39 | -116.14          | 57.29                | <b>-58.85 ± 5.29</b>  |
|                      | CMLDID4027    | -61.04 | -205.26 | 222.49 | -6.74 | -266.31          | 215.75               | <b>-50.56 ± 2.94</b>  |
|                      | CMLDID58966   | -62.51 | -33.79  | 50.79  | -7.24 | -96.31           | 43.55                | <b>-52.76 ± 2.82</b>  |
|                      | CMLDID24389   | -62.58 | -40.44  | 55.33  | -7.80 | -103.03          | 47.53                | <b>-55.49 ± 3.72</b>  |
|                      | CMLDID53434   | -63.49 | -31.62  | 50.30  | -7.83 | -95.11           | 42.47                | <b>-52.64 ± 3.59</b>  |
|                      | CMLDID36658   | -59.95 | -23.00  | 43.39  | 3.63  | -82.96           | 36.41                | <b>-46.55 ± 3.89</b>  |
|                      | CMLDID18416   | -57.38 | -22.84  | 40.04  | -6.98 | -80.22           | 33.07                | <b>-47.15 ± 4.21</b>  |

## References

- [1] M. Ahumado Monterrosa, J. F. Galindo, J. Vergara Lorduy, J. Alí-Torres, R. Vivas-Reyes, *J. Mol. Graph. Model.* **2019**, *86*, 113–124.
- [2] M. A. Hossain, N. Sattenapally, H. I. Parikh, W. Li, K. P. Rumbaugh, N. A. German, *Eur. J. Med. Chem.* **2020**, *185*, 111800.
- [3] J. Rajkumari, S. Borkotoky, A. Murali, K. Suchiang, S. K. Mohanty, S. Busi, *Microb. Pathog.* **2018**, *118*, 48–60.
- [4] L. Zhong, V. Ravichandran, N. Zhang, H. Wang, X. Bian, Y. Zhang, A. Li, *Int. J. Mol. Sci.* **2020**, *21*, DOI 10.3390/ijms21062190.
- [5] M. C. O'Reilly, H. E. Blackwell, *ACS Infect. Dis.* **2016**, *2*, 32–38.
- [6] S. Y. Y. Tan, S. L. Chua, Y. Chen, S. A. Rice, S. Kjelleberg, T. E. Nielsen, L. Yang, M. Givskov, *Antimicrob. Agents Chemother.* **2013**, *57*, 5629–5641.

- [7] A. Annapoorani, V. Umamageswaran, R. Parameswari, S. K. Pandian, A. V. Ravi, *J. Comput. Aided. Mol. Des.* **2012**, *26*, 1067–1077.
- [8] F. Soukariéh, P. Williams, M. J. Stocks, M. Cámara, *J. Med. Chem.* **2018**, *61*, 10385–10402.
- [9] V. L. A. Malladi, A. J. Sobczak, N. Maricic, S. K. Murugapiran, L. Schneper, J. Makemson, K. Mathee, S. F. Wnuk, *Bioorg. Med. Chem.* **2011**, *19*, 5500–5506.
- [10] C. E. McInnis, H. E. Blackwell, *Bioorg. Med. Chem.* **2011**, *19*, 4820–4828.
- [11] C. A. Lowery, N. T. Salzameda, D. Sawada, G. F. Kaufmann, K. D. Janda, *J. Med. Chem.* **2010**, *53*, 7467–7489.
- [12] M. E. Boursier, D. E. Manson, J. B. Combs, H. E. Blackwell, *Bioorg. Med. Chem.* **2018**, *26*, 5336–5342.
- [13] M. Ahumedo, A. Díaz, R. Vivas-Reyes, *Eur. J. Med. Chem.* **2010**, *45*, 608–615.
- [14] L. Yang, M. T. Rybtke, T. H. Jakobsen, M. Hentzer, T. Bjarnsholt, M. Givskov, T. Tolker-Nielsen, *Antimicrob. Agents Chemother.* **2009**, *53*, 2432–2443.
